# Supplementary material
Source: PubMed Central journal article supplement (PMC9533917)
Supplement: mmc1.pdf [file mmc1.pdf]

# THE LANCET Microbe

## Supplementary appendix

This appendix formed part of the original submission and has been peer reviewed. We post it as supplied by the authors.

Supplement to: Dashraath P, Alves M P, Schwartz DA, et al. Potential mechanisms of intrauterine transmission of monkeypox virus. *Lancet Microbe* 2022; published online Sept 13. [https://doi.org/10.1016/S2666-5247\(22\)00260-9](https://doi.org/10.1016/S2666-5247(22)00260-9).

## Appendix

### Potential mechanisms of intrauterine transmission of monkeypox virus

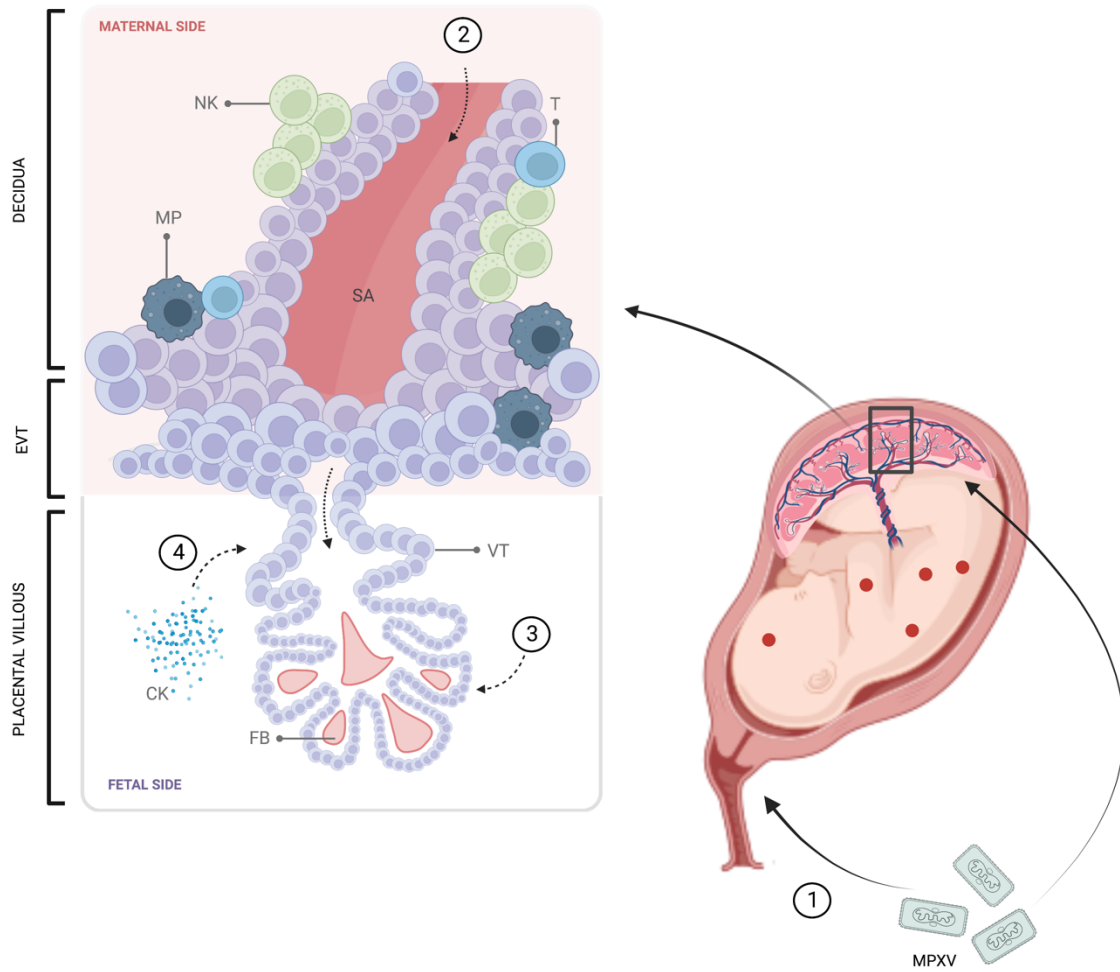

**Figure S1: Intrauterine transmission of monkeypox virus**

MPXV = monkeypox virus; T = T lymphocytes; NK = natural killer cells; MP = macrophages; SA = spiral artery; CK = cytokines; FB = fetal blood; VT = villous trophoblast; EVT = extravillous trophoblast.

Numbers 1 – 4 correspond to the pathways described in the main text.

Figure created by the authors with BioRender.com and exported with publication and licensing rights.
